# Supplementary material for: Performance enhancement in up-conversion nanoparticle-embedded perovskite solar cells by harvesting near-infrared sunlight
Source: Royal Society of Chemistry journal article supplement (doi:10.1039/c9qm00311h), 2019-01-01
Supplement: c9qm00311h1.pdf [file c9qm00311h1.pdf]

## Supporting Information

### **Performance enhancement in up-conversion nanoparticles-embedded perovskite solar cells by harvesting near-infrared sunlight**

Dongyu Ma,<sup>†a</sup> Yingli Shen,<sup>†b</sup> Tongtong Su,<sup>a</sup> Juan Zhao,<sup>a\*</sup> Naveed Ur Rahman,<sup>a</sup> Zongliang Xie,<sup>a</sup> Feng Shi,<sup>b\*</sup> Shizhao Zheng,<sup>a\*</sup> Yi Zhang<sup>a</sup> and Zhenguo Chi<sup>a</sup>

<sup>a</sup>PCFM Lab, GD HPPC Lab, Guangdong Engineering Technology Research Center for High-performance Organic and Polymer Photoelectric Functional Films, State Key Laboratory of Optoelectronic Material and Technologies, School of Chemistry, Sun Yat-sen University, Guangzhou 510275, PR China

<sup>b</sup>Key Laboratory of Applied Surface and Colloid Chemistry, Ministry of Education, Shaanxi Key Laboratory for Advanced Energy Devices, Shaanxi Engineering Lab for Advanced Energy Technology, School of Materials Science & Engineering, Shaanxi Normal University, Xi'an 710119, PR China

E-mail: zhaoj95@mail.sysu.edu.cn, zshizhao@mail.sysu.edu.cn, shifeng@snnu.edu.cn

<sup>†</sup>These authors are contributed equally to this work.

# 1 Experimental

## 1.1 Device fabrication

The patterned fluorine-doped tin oxide (FTO) substrates with a sheet resistance of  $7 \Omega \text{ sq}^{-1}$  were cleaned by sonication sequentially with acetone, detergent, deionized water and isopropyl alcohol for 15 min respectively. The substrates were further treated with oxygen plasma to remove organic impurities. A compact-TiO<sub>2</sub> (c-TiO<sub>2</sub>) layer was deposited on the clean pre-heated FTO substrates by spray pyrolysis from a precursor solution of titanium diisopropoxide bis (acetylacetonate) solution, followed by sintering at 500 °C for 50 min. The UCNP layer was spin-coated on the layer of c-TiO<sub>2</sub> at 5000 rpm for 20 s. The samples were annealed at 80 °C for 30 min in the glovebox. For one-step method, PbI<sub>2</sub>, FAI, MABr, and PbBr<sub>2</sub> were dissolved together in a mixed solvent of DMF and DMSO (DMF: DMSO = 4:1 in volume ratio) to form a 1 M precursor solution. The MABr and PbBr<sub>2</sub> (1:1 molar ratio) had 10 mol% in total perovskite precursor solution. Meanwhile, CsI was dissolved in 1 mL DMSO solution. The CsI solution was added into the perovskite precursor solution (1:20 volume ratio) and then the mixed solution was stirred overnight under a temperature of 60 °C. In one-step method, 45  $\mu\text{L}$  of mixed perovskite precursor solution was first dropped on the UCNP layer and followed by spin coating. The spin rate was 1000 rpm for 10 s in the step one and then increased to 6000 rpm for 20 s in the step two. 100  $\mu\text{L}$  of chlorobenzene was dropped onto the spinning-film 5 s prior to the end of the second step. The as-prepared films were dried at 70 °C for 10 min and then thermally annealed at 100 °C for 60 min, resulting in mixed-cation perovskite Cs<sub>0.05</sub>(MA<sub>0.17</sub>FA<sub>0.83</sub>)<sub>99.5</sub>Pb(I<sub>0.83</sub>Br<sub>0.17</sub>)<sub>3</sub> film. Spiro-OMeTAD was used as the hole-transporting layer and was spin coated on the perovskite layer by using 45  $\mu\text{L}$  solution (85.7 mg, 33.84  $\mu\text{L}$  4-tert-butylpyridine, 10.05 mg lithium bis(trifluoromethyl sulphonyl) imide and 3.16 mg FK209 dissolved in 1 mL chlorobenzene) at 4000 rpm for 20 s. All the film deposition processes were performed in an N<sub>2</sub>-filled glovebox. Finally, the devices were finished by thermally evaporating a 100-nm Au electrode layer. The active area of the solar cells was defined to be 0.07 cm<sup>2</sup> by using metal masks.

## 1.2 Device characterizations

The photocurrent density–voltage ( $J$ – $V$ ) curves were measured using the solar simulator (ABET Sun 3000 solar simulator) with Keithely model 2400 as a digital source meter under illumination of AM 1.5G solar light ( $100 \text{ mW cm}^{-2}$ ). The incident photon to current efficiency (IPCE) as a function of wavelength of the PSCs was measured by a PV measurements QEXL from 300 to 900 nm. The devices stability measurements were performed in ambient environment at  $25 \text{ }^\circ\text{C}$  and with relative humidity of 20%. The NIR response of the PSC devices was tested using a 980 nm laser ( $3 \text{ W cm}^{-2}$ ) with an 800 nm high-pass optical filter on the light path. Time-resolved PL (TRPL) spectra were examined by using a fluorescence spectrophotometer RF-5301PC under excitation of a 470 nm pulsed laser.

## 2. Supplementary figures

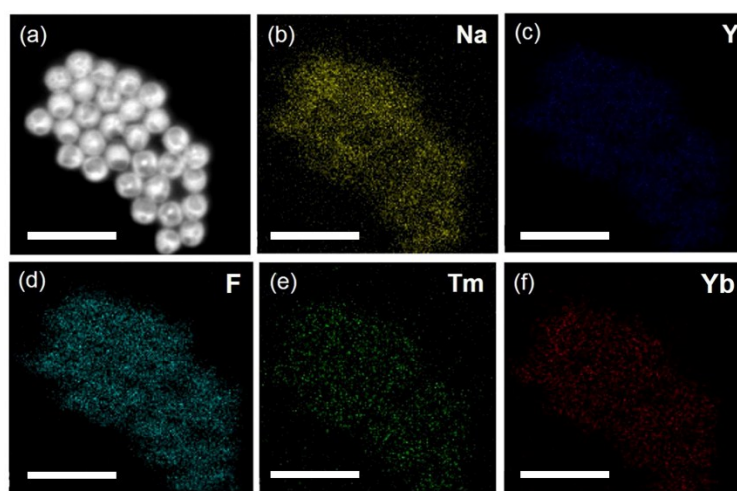

**Figure S1.** (a) STEM image and (b-f) EDX elemental mapping of  $\beta$ - $\text{NaYF}_4$ :18%Yb,0.5%Tm UCNPs and line-profile analysis of  $\beta$ - $\text{NaYF}_4$ :18%Yb,0.5%Tm UCNPs with different elements (Na, Y, F, Tm and Yb). All of the scale bars are 100 nm.

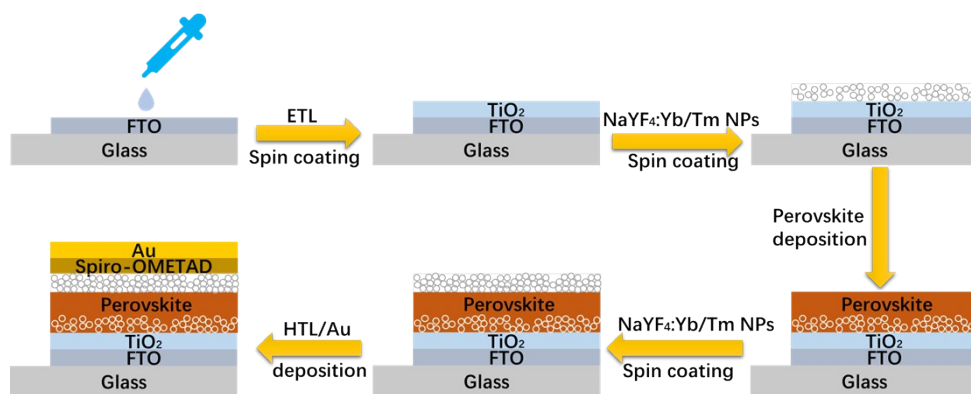

**Figure S2.** Fabrication processes for the double-UC PSCs.

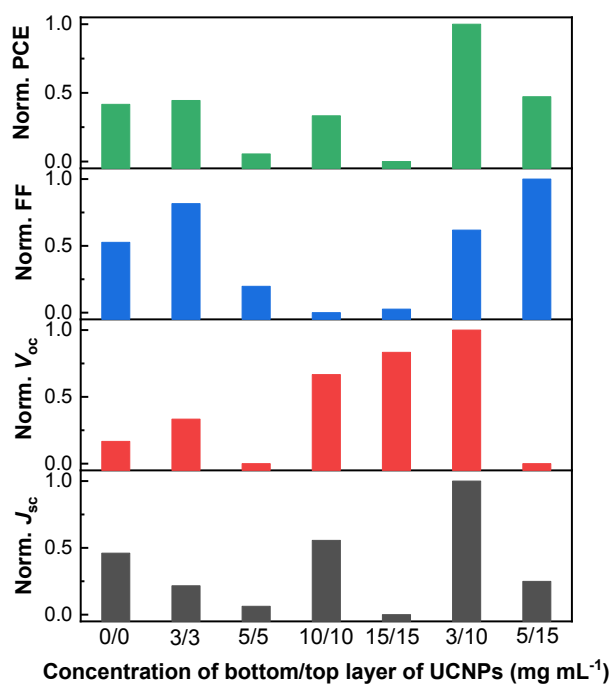

**Figure S3.** Normalized photovoltaic parameters of double-UC PSCs with different concentrations of UCNP (bottom layer/top layer).

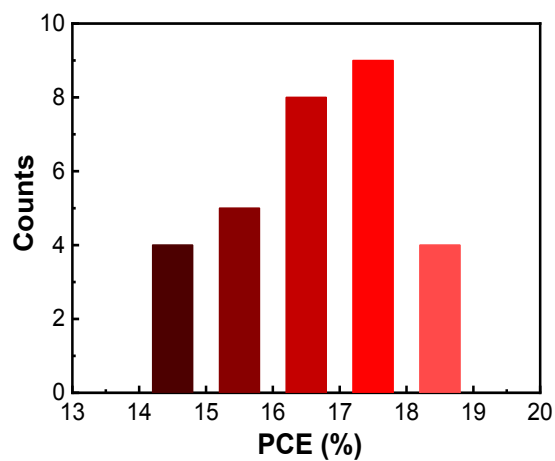

Figure S4. Statistical histogram of the double-UC PSCs.

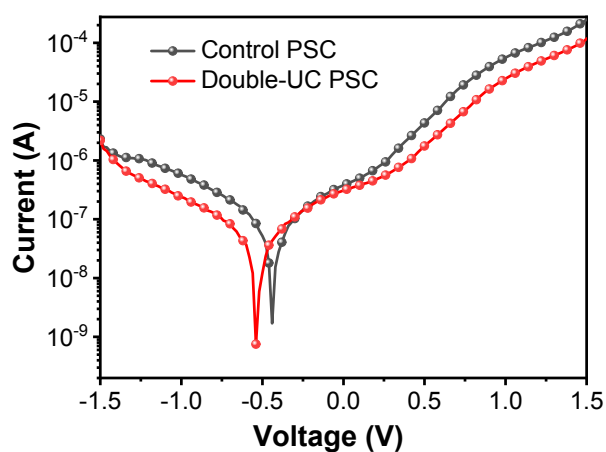

Figure S5. Dark I-V curves of the control and the double-UC PSCs.

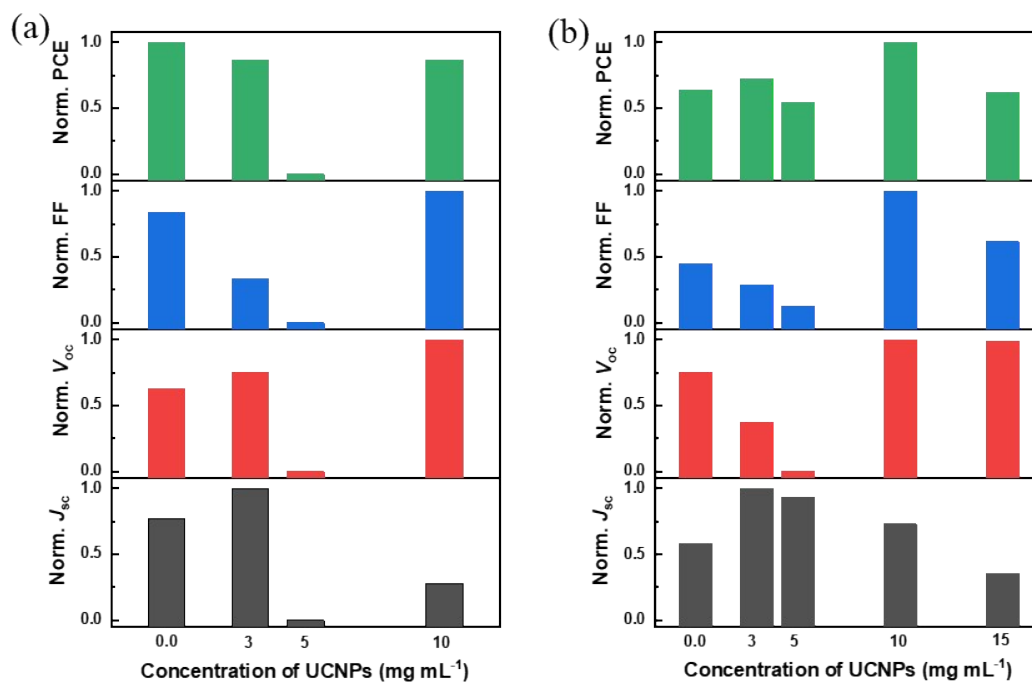

**Figure S6.** Normalized photovoltaic parameters of (a) B-UC PSCs and (b) T-UC PSCs with different concentrations of UCNPs.

**Table S1** Comparison of photovoltaic performance in PSCs incorporated with up-conversion nanomaterials.

| UCNPs                                                           | $J_{sc}$<br>(mA cm <sup>-2</sup> ) | $V_{oc}$<br>(V) | FF<br>(%) | PCE<br>(%) | Ref.      |
|-----------------------------------------------------------------|------------------------------------|-----------------|-----------|------------|-----------|
| $\beta$ -NaYF <sub>4</sub> :Yb <sup>3+</sup> ,Tm <sup>3+</sup>  | 25.46                              | 1.06            | 67.50     | 18.20      | This work |
| $\beta$ -NaYF <sub>4</sub> :Yb <sup>3+</sup> ,Er <sup>3+</sup>  | 22.71                              | 1.15            | 75.39     | 19.70      | [1]       |
| NaYF <sub>4</sub> :Yb <sup>3+</sup> ,Er <sup>3+</sup>           | 22.60                              | 1.06            | 73.90     | 17.80      | [2]       |
| $\beta$ -NaYF <sub>4</sub> :Yb <sup>3+</sup> , Er <sup>3+</sup> | 20.23                              | 1.10            | 72.00     | 15.98      | [3]       |
| $\beta$ -NaYF <sub>4</sub> :Yb <sup>3+</sup> ,Tm <sup>3+</sup>  | 21.70                              | 1.10            | 70.60     | 16.90      | [4]       |

## References

- [1] F.-L. Meng, J.-J. Wu, E.-F. Zhao, Y.-Z. Zheng, M.-L. Huang, L.-M. Dai, X. Tao, J.-F. Chen, *Nanoscale*, **2017**, 9, 18535–18545.
- [2] M. He, X. Pang, X. Liu, B. Jiang, Y. He, H. Snaith, Z. Lin, *Angew. Chem. Int. Ed.*, **2016**, 55, 4280–4284.
- [3] J. Roh, H. Yu, J. Jang, *ACS Appl. Mater. Interfaces*, **2016**, 8, 19847–19852.
- [4] M. Que, W. Que, X. Yin, P. Chen, Y. Yang, J. Hu, B. Yu, Y. Du, *Nanoscale*, **2016**, 8, 14432.
